# Supplementary material for: Comorbidity Status and Annual Total Medical Expenditures in U.S. Hypertensive Adults
Source: PubMed Central journal article supplement — Am J Prev Med. Author manuscript; Available in PMC 2018 Mar 5. (PMC5836318; doi:10.1016/j.amepre.2017.07.014), 2017-12
Supplement: NIHMS945835-supplement-Appendix.pdf [file NIHMS945835-supplement-Appendix.pdf]

**Appendix Table 1.** List of the Comorbid Conditions and Associated ICD-9 Codes Used in the Modified Elixhauser Comorbidity Index (EI)

| <b>Comorbid condition</b>                                       | <b>ICD-9</b>                                |
|-----------------------------------------------------------------|---------------------------------------------|
| <b>A. Cardiovascular disease (CVD) and hypertension-related</b> |                                             |
| Congestive heart failure                                        | 428                                         |
| Heart rhythm disorders <sup>a</sup>                             | 426, 427                                    |
| Valvular disease                                                | 394–397, 424, 746                           |
| Coronary heart disease <sup>b</sup>                             | 410–414                                     |
| Stroke <sup>b</sup>                                             | 430–438                                     |
| Hyperlipidemia <sup>b</sup>                                     | 272                                         |
| Pulmonary circulation disorders                                 | 415–417                                     |
| Peripheral vascular disorders                                   | 440, 441, 443, 447, 557                     |
| Diabetes <sup>c</sup>                                           | 250                                         |
| Renal disease <sup>d</sup>                                      | 585, 586, 588, V56                          |
| Obesity                                                         | 278                                         |
| Depression                                                      | 296, 300, 309, 311                          |
| <b>B. Others</b>                                                |                                             |
| Paralysis                                                       | 334, 342–344                                |
| Neurological disorders                                          | 331–336, 340, 341, 345, 348                 |
| Hypothyroidism                                                  | 240, 243, 244, 246                          |
| Liver disease                                                   | 070, 456, 570–573                           |
| Peptic ulcer                                                    | 531, 532, 533, 534                          |
| HIV/AIDS                                                        | 042–044                                     |
| Lymphoma                                                        | 200–203                                     |
| Metastatic cancer                                               | 196, 197, 198, 199                          |
| Solid tumor                                                     | 140–172, 174–195                            |
| Rheumatoid arthritis                                            | 446, 701, 710, 711, 714, 719, 720, 725, 728 |
| Coagulopathy                                                    | 286, 287                                    |
| Weight loss                                                     | 260–263                                     |
| Fluid and electrolyte disorders                                 | 276                                         |
| Anemia <sup>e</sup>                                             | 280, 281                                    |
| Alcohol abuse                                                   | 291, 303, 980                               |
| Drug abuse                                                      | 292, 304, 305                               |
| Psychoses                                                       | 293, 295, 297, 298                          |
| Chronic pulmonary disease                                       | 416, 490–496, 500–505                       |

<sup>a</sup>Arrhythmia in the original EI was renamed heart rhythm disorders for this study.

<sup>b</sup>These CVD conditions were not included in the original EI, but they were added to the modified EI in this study.

<sup>c</sup>Diabetes was included as two groups (diabetes with complications, diabetes without complications) in the original EI, but the groups were combined into one group in this study.

<sup>d</sup>Renal failure in the original EI was renamed renal disease for this study.

<sup>e</sup>Anemia was included as two groups (blood loss anemia and deficiency anemia) in the original EI, but these were combined into one group in the present study.

**Appendix**  
**Comorbidity Status and Annual Total Medical Expenditures in U.S. Hypertensive Adults**  
**Park et al.**

**Appendix Table 2.** Generalized Linear Model Estimates on Total Medical Expenditures in U.S. Hypertensive Adults, 2011–2014 Medical Expenditure Panel Survey (n=26,049)

| <b>Variable</b>                     | <b>Coefficient (SE)</b> | <b>p-value</b> |
|-------------------------------------|-------------------------|----------------|
| <b>Elixhauser comorbidity index</b> |                         |                |
| 0                                   | –0.76 (0.07)            | <0.001         |
| 1                                   | –0.36 (0.05)            | <0.001         |
| 2                                   | ref                     |                |
| ≥3                                  | 0.51 (0.04)             | <0.001         |
| <b>Age group, years</b>             |                         |                |
| 18–44                               | –0.21 (0.07)            | 0.004          |
| 45–64                               | ref                     |                |
| ≥65                                 | 0.02 (0.03)             | 0.495          |
| <b>Gender</b>                       |                         |                |
| Male                                | ref                     |                |
| Female                              | 0.07 (0.03)             | 0.041          |
| <b>Race/ethnicity</b>               |                         |                |
| Hispanic                            | –0.20 (0.06)            | <0.001         |
| White, non-Hispanic                 | ref                     |                |
| Black, non-Hispanic                 | –0.11 (0.04)            | 0.003          |
| Asian and other, non-Hispanic       | –0.20 (0.06)            | 0.002          |
| <b>Region</b>                       |                         |                |
| Northeast                           | ref                     |                |
| Midwest                             | –0.06 (0.06)            | 0.331          |
| South                               | –0.18 (0.05)            | 0.001          |
| East                                | –0.09 (0.06)            | 0.158          |
| <b>Insurance</b>                    |                         |                |
| Any private                         | ref                     |                |
| Public only                         | –0.07 (0.04)            | 0.055          |
| Uninsured                           | –0.74 (0.10)            | <0.001         |
| <b>Marital status</b>               |                         |                |
| Married                             | ref                     |                |
| Unmarried                           | 0.06 (0.04)             | 0.118          |
| <b>Education</b>                    |                         |                |
| Less than high school               | –0.03 (0.06)            | 0.603          |
| High school                         | ref                     |                |
| College or higher                   | 0.13 (0.03)             | <0.001         |
| <b>Poverty level</b>                |                         |                |
| Negative/poor/low                   | 0.08 (0.04)             | 0.057          |
| Middle                              | ref                     |                |
| High                                | 0.08 (0.04)             | 0.075          |
| <b>Smoking</b>                      |                         |                |
| Yes                                 | ref                     |                |
| No                                  | 0.14 (0.05)             | 0.009          |
| <b>Health status</b>                |                         |                |
| Excellent                           | –0.15 (0.06)            | 0.012          |
| Very good                           | ref                     |                |
| Good                                | 0.29 (0.04)             | <0.001         |
| Fair /poor                          | 0.76 (0.04)             | <0.001         |
| Constant                            | 8.61 (0.09)             | <0.001         |

*Note:* The results were generated from the generalized linear model (GLM) with log link and gamma distribution.

**Appendix**  
**Comorbidity Status and Annual Total Medical Expenditures in U.S. Hypertensive Adults**  
**Park et al.**

**Appendix Table 3.** Estimated Annual Medical Expenditures (2014 U.S. Dollars) by 15 Most Frequent Comorbid Conditions in U.S. Hypertensive Adults, 2011–2014 Medical Expenditure Panel Survey

| Comorbid condition                                              | Medical expenditures, \$ (95% CIs) |                         | Difference in medical expenditures |
|-----------------------------------------------------------------|------------------------------------|-------------------------|------------------------------------|
|                                                                 | Without comorbid condition         | With comorbid condition |                                    |
| <b>A. Cardiovascular disease (CVD) and hypertension-related</b> |                                    |                         |                                    |
| Congestive heart failure                                        | 9,683 (9,313–10,053)               | 17,063 (16,224–17,902)  | 7,380                              |
| Stroke                                                          | 9,555 (9,190–9,920)                | 15,624 (14,903–16,345)  | 6,069                              |
| Coronary heart disease                                          | 8,818 (8,490–9,146)                | 14,864 (14,155–15,573)  | 6,046                              |
| Heart rhythm disorders                                          | 9,528 (9,169–9,887)                | 14,621 (13,904–15,338)  | 5,093                              |
| Diabetes                                                        | 8,468 (8,145–8,790)                | 13,506 (12,929–14,084)  | 5,039                              |
| Renal disease                                                   | 9,274 (8,925–9,623)                | 14,248 (13,601–14,895)  | 4,974                              |
| Depression                                                      | 8,597 (8,287–8,906)                | 13,523 (12,887–14,159)  | 4,926                              |
| Hyperlipidemia                                                  | 7,114 (6,855–7,372)                | 11,965 (11,457–12,472)  | 4,851                              |
| Valvular disease                                                | 9,776 (9,402–10,149)               | 14,228 (13,475–14,981)  | 4,453                              |
| <b>B. Others</b>                                                |                                    |                         |                                    |
| Neurological disorders                                          | 9,635 (9,269–10,001)               | 15,766 (14,988–16,544)  | 6,131                              |
| Chronic pulmonary disease                                       | 8,943 (8,612–9,274)                | 14,183 (13,514–14,851)  | 5,240                              |
| Solid tumor                                                     | 9,538 (9,177–9,899)                | 14,452 (13,759–15,144)  | 4,914                              |
| Fluid and electrolyte disorders                                 | 9,717 (9,346–10,088)               | 14,377 (13,705–15,049)  | 4,660                              |
| Hypothyroidism                                                  | 9,313 (8,968–9,658)                | 13,568 (12,909–14,226)  | 4,254                              |
| Rheumatoid arthritis                                            | 8,783 (8,462–9,104)                | 12,688 (12,127–13,249)  | 3,905                              |

*Note:* The mean annual medical expenditures were estimated using the average marginal effects method from the generalized linear model (GLM) with log link and gamma distribution.
